# Supplementary material
Source: publisher site journal article supplement (https://www.dovepress.com/article/153458)

## **Supplementary Material**

This appendix is provided by the authors to give readers additional information about their study.

**Figure S1 – Overview of the study design**

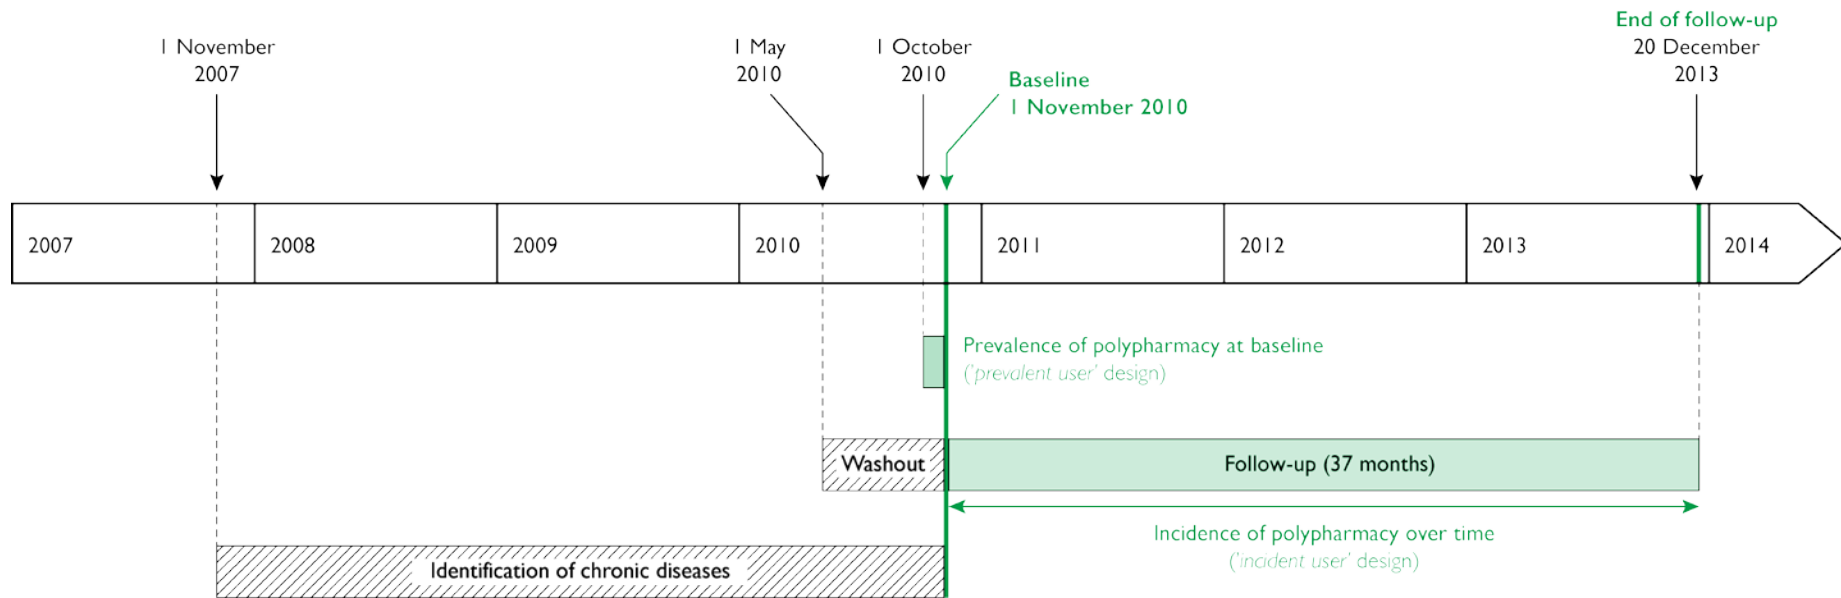

**Figure S2 – Calculation of monthly drug exposure in the Swedish Prescribed Drugs Register**

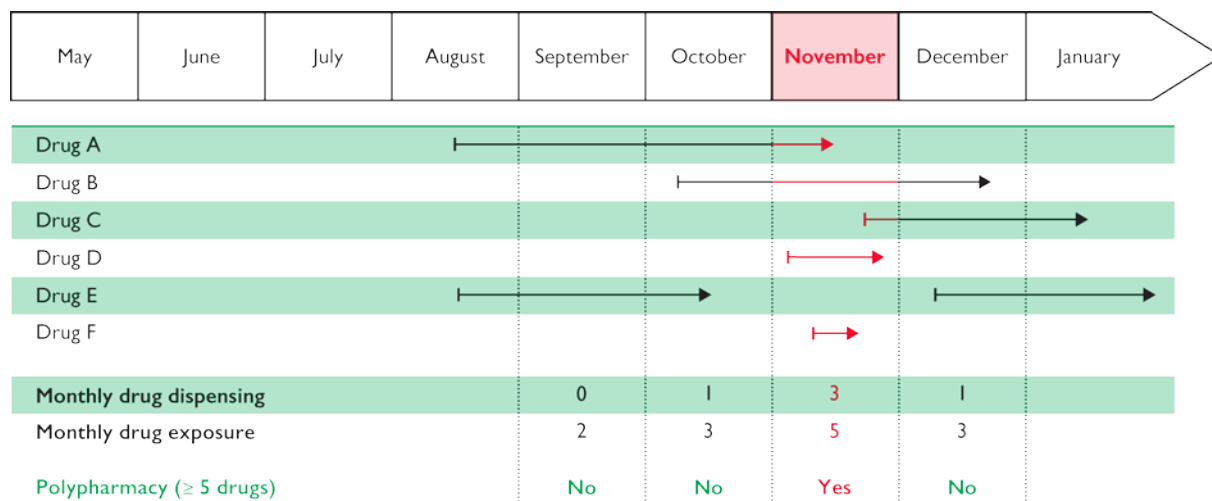

*Tick marks represent the date of drug dispensing (“start date”), horizontal lines represent the estimated duration of drug exposure, and arrows represent the end of drug exposure (“end date”).*

**Table S1 – Characteristics of older adults not exposed to excessive polypharmacy ( $\geq 10$  drugs) during the 6-month washout period before baseline**

|                                       | No. (%)           |
|---------------------------------------|-------------------|
| <b>Total</b>                          | <b>1 438 437</b>  |
| <b>Sex</b>                            |                   |
| Men                                   | 668 824 (46.5%)   |
| Women                                 | 769 613 (53.5%)   |
| <b>Age, years</b>                     |                   |
| Mean (SD)                             | 74.4 (7.6)        |
| No. (%)                               |                   |
| 65 to 74 years                        | 829 870 (57.7%)   |
| 75 to 84 years                        | 430 419 (29.9%)   |
| 85 to 94 years                        | 165 881 (11.5%)   |
| 95 years and older                    | 12 267 (0.9%)     |
| <b>Living arrangement</b>             |                   |
| Community                             | 1 390 021 (96.6%) |
| Nursing home                          | 48 416 (3.4%)     |
| <b>Number of chronic diseases</b>     |                   |
| Mean (SD)                             | 1.8 (1.8)         |
| No. (%)                               |                   |
| 0                                     | 428 925 (29.8%)   |
| 1                                     | 356 518 (24.8%)   |
| 2                                     | 252 591 (17.6%)   |
| 3                                     | 166 091 (11.5%)   |
| 4                                     | 104 135 (7.2%)    |
| $\geq 5$                              | 130 177 (9%)      |
| <b>Drug dispensing scheme</b>         |                   |
| Ordinary prescriptions                | 1 366 289 (95%)   |
| Multi-dose dispensing                 | 72 148 (5.0%)     |
| <b>Time to death</b>                  |                   |
| >12 months                            | 1 395 667 (97.0%) |
| $\leq 12$ months                      | 42 770 (3.0%)     |
| <b>Level of education<sup>a</sup></b> |                   |
| Primary education                     | 509 698 (35.4%)   |
| Lower secondary education             | 97 280 (6.8%)     |
| Upper secondary education             | 516 418 (35.9%)   |
| Higher education                      | 284 269 (19.8%)   |

<sup>a</sup> Missing values for the level of education:  $n=30,772$

**Table S2 – Proportion of older adults exposed to polypharmacy according to various cut-off points**

|                                   | <b>≥2 drugs</b> | <b>≥3 drugs</b> | <b>≥4 drugs</b> | <b>≥5 drugs</b> | <b>≥6 drugs</b> | <b>≥7 drugs</b> | <b>≥8 drugs</b> | <b>≥9 drugs</b> | <b>≥10 drugs</b> |
|-----------------------------------|-----------------|-----------------|-----------------|-----------------|-----------------|-----------------|-----------------|-----------------|------------------|
| <b>Total cohort</b>               | 74.0%           | 63.9%           | 53.8%           | 44.0%           | 35.1%           | 27.4%           | 21.0%           | 15.8%           | 11.7%            |
| <b>Sex</b>                        |                 |                 |                 |                 |                 |                 |                 |                 |                  |
| Men                               | 70.5%           | 60.3%           | 50.2%           | 40.4%           | 31.6%           | 24.1%           | 18.1%           | 13.3%           | 9.6%             |
| Women                             | 76.9%           | 66.8%           | 56.7%           | 47.0%           | 38.0%           | 30.1%           | 23.4%           | 17.9%           | 13.4%            |
| <b>Age, years</b>                 |                 |                 |                 |                 |                 |                 |                 |                 |                  |
| 65 to 74 years                    | 65.2%           | 53.3%           | 42.4%           | 32.8%           | 24.9%           | 18.5%           | 13.7%           | 10.0%           | 7.3%             |
| 75 to 84 years                    | 81.8%           | 73.1%           | 63.2%           | 53.0%           | 43.1%           | 34.0%           | 26.3%           | 19.9%           | 14.8%            |
| 85 to 94 years                    | 89.2%           | 82.8%           | 74.8%           | 65.5%           | 55.5%           | 45.5%           | 36.3%           | 28.2%           | 21.2%            |
| 95 years and older                | 89.1%           | 83.3%           | 76.0%           | 67.0%           | 57.1%           | 46.8%           | 37.1%           | 28.3%           | 20.9%            |
| <b>Level of education</b>         |                 |                 |                 |                 |                 |                 |                 |                 |                  |
| Primary education                 | 78.7%           | 69.8%           | 60.1%           | 50.3%           | 40.9%           | 32.4%           | 25.1%           | 19.1%           | 14.2%            |
| Lower secondary education         | 73.7%           | 63.4%           | 53.1%           | 43.3%           | 34.5%           | 26.9%           | 20.7%           | 15.6%           | 11.5%            |
| Upper secondary education         | 73.1%           | 62.6%           | 52.1%           | 42.3%           | 33.4%           | 25.9%           | 19.7%           | 14.8%           | 10.9%            |
| Higher education                  | 68.1%           | 56.2%           | 45.3%           | 35.6%           | 27.4%           | 20.7%           | 15.3%           | 11.3%           | 8.2%             |
| <b>Living arrangement</b>         |                 |                 |                 |                 |                 |                 |                 |                 |                  |
| Community                         | 72.8%           | 62.3%           | 51.9%           | 42.0%           | 33.0%           | 25.4%           | 19.1%           | 14.2%           | 10.4%            |
| Nursing home                      | 95.3%           | 92.5%           | 88.0%           | 81.7%           | 73.8%           | 64.6%           | 54.7%           | 44.8%           | 35.5%            |
| <b>Number of chronic diseases</b> |                 |                 |                 |                 |                 |                 |                 |                 |                  |
| 0                                 | 39.7%           | 26.7%           | 16.7%           | 9.7%            | 5.3%            | 2.8%            | 1.5%            | 0.8%            | 0.4%             |
| 1                                 | 69.6%           | 54.7%           | 40.7%           | 28.6%           | 18.9%           | 11.9%           | 7.2%            | 4.2%            | 2.4%             |
| 2                                 | 83.3%           | 71.6%           | 58.5%           | 45.4%           | 33.4%           | 23.4%           | 15.7%           | 10.2%           | 6.4%             |
| 3                                 | 91.0%           | 82.9%           | 72.3%           | 59.9%           | 47.2%           | 35.4%           | 25.5%           | 17.7%           | 11.8%            |
| 4                                 | 94.9%           | 89.6%           | 81.8%           | 71.5%           | 59.6%           | 47.5%           | 36.2%           | 26.6%           | 18.8%            |
| ≥5                                | 98.1%           | 96.1%           | 92.6%           | 87.2%           | 79.8%           | 70.8%           | 60.9%           | 50.9%           | 41.2%            |
| <b>Drug dispensing scheme</b>     |                 |                 |                 |                 |                 |                 |                 |                 |                  |
| Ordinary prescriptions            | 71.7%           | 60.8%           | 50.1%           | 40.0%           | 31.0%           | 23.4%           | 17.3%           | 12.7%           | 9.1%             |
| Multi-dose dispensing             | 98.9%           | 97.1%           | 93.7%           | 88.0%           | 80.3%           | 71.0%           | 60.6%           | 50.2%           | 40.2%            |
| <b>Time to death</b>              |                 |                 |                 |                 |                 |                 |                 |                 |                  |
| >12 months                        | 73.2%           | 62.8%           | 52.4%           | 42.6%           | 33.6%           | 26.0%           | 19.6%           | 14.6%           | 10.7%            |
| ≤12 months                        | 92.1%           | 88.0%           | 82.5%           | 75.6%           | 67.5%           | 59.0%           | 50.1%           | 41.7%           | 33.6%            |

**Table S3 – Prevalence of and factors associated with excessive polypharmacy at baseline**

|                                   | Cohort           | Excessive polypharmacy ( $\geq 10$ medications) |                               |
|-----------------------------------|------------------|-------------------------------------------------|-------------------------------|
|                                   | No. individuals  | Prevalence (%)                                  | Adj. OR (95% CI) <sup>a</sup> |
| <b>Total cohort</b>               | <b>1 742 336</b> | 203 698 (11.7%)                                 | –                             |
| <b>Sex</b>                        |                  |                                                 |                               |
| Men                               | 782 503          | 75 394 (9.6%)                                   | 1                             |
| Women                             | 959 833          | 128 304 (13.4%)                                 | 1.45 (1.44–1.47)              |
| <b>Age, years</b>                 |                  |                                                 |                               |
| 65 to 74 years                    | 936 163          | 68 222 (7.3%)                                   | 1                             |
| 75 to 84 years                    | 551 710          | 81 628 (14.8%)                                  | 1.11 (1.10–1.12)              |
| 85 to 94 years                    | 237 086          | 50 220 (21.2%)                                  | 1.03 (1.01–1.04)              |
| 95 years and older                | 17 377           | 3628 (20.9%)                                    | 0.84 (0.80–0.88)              |
| <b>Living arrangement</b>         |                  |                                                 |                               |
| Community                         | 1 652 329        | 171 739 (10.4%)                                 | 1                             |
| Nursing home                      | 90 007           | 31 959 (35.5%)                                  | 1.07 (1.05–1.09)              |
| <b>Number of chronic diseases</b> |                  |                                                 |                               |
| 0                                 | 432 537          | 1737 (0.4%)                                     | 1                             |
| 1                                 | 373 378          | 8938 (2.4%)                                     | 5.48 (5.20–5.77)              |
| 2                                 | 284 124          | 18 117 (6.4%)                                   | 14.31 (13.61–15.05)           |
| 3                                 | 206 689          | 24 470 (11.8%)                                  | 27.16 (25.84–28.55)           |
| 4                                 | 148 141          | 27 806 (18.8%)                                  | 45.38 (43.18–47.70)           |
| $\geq 5$                          | 297 467          | 122 630 (41.2%)                                 | 130.2 (124.02–136.65)         |
| <b>Drug dispensing scheme</b>     |                  |                                                 |                               |
| Ordinary prescriptions            | 1 595 776        | 144 852 (9.1%)                                  | 1                             |
| Multi-dose dispensing             | 146 560          | 58 846 (40.2%)                                  | 2.85 (2.80–2.90)              |
| <b>Time to death</b>              |                  |                                                 |                               |
| >12 months                        | 1 665 908        | 177 999 (10.7%)                                 | 1                             |
| $\leq 12$ months                  | 76 428           | 25 699 (33.6%)                                  | 1.50 (1.47–1.53)              |
| <b>Level of education</b>         |                  |                                                 |                               |
| Primary education                 | 641 947          | 91 092 (14.2%)                                  | 1                             |
| Lower secondary education         | 117 615          | 13 520 (11.5%)                                  | 0.94 (0.92–0.96)              |
| Upper secondary education         | 618 285          | 67 544 (10.9%)                                  | 0.93 (0.93–0.95)              |
| Higher education                  | 326 724          | 26 839 (8.2%)                                   | 0.80 (0.79–0.82)              |

<sup>a</sup> Logistic regression model including all presented covariates as independent variables. Because of missing values for the level of education (n=37 765), adjusted odds ratios (OR) and 95% confidence intervals (CI) are calculated for a subset of 1 704 571 individuals (97.8% of total)

**Figure S3 – Age-specific prevalence of polypharmacy ( $\geq 5$  drugs) at baseline, by living arrangement and drug dispensing**

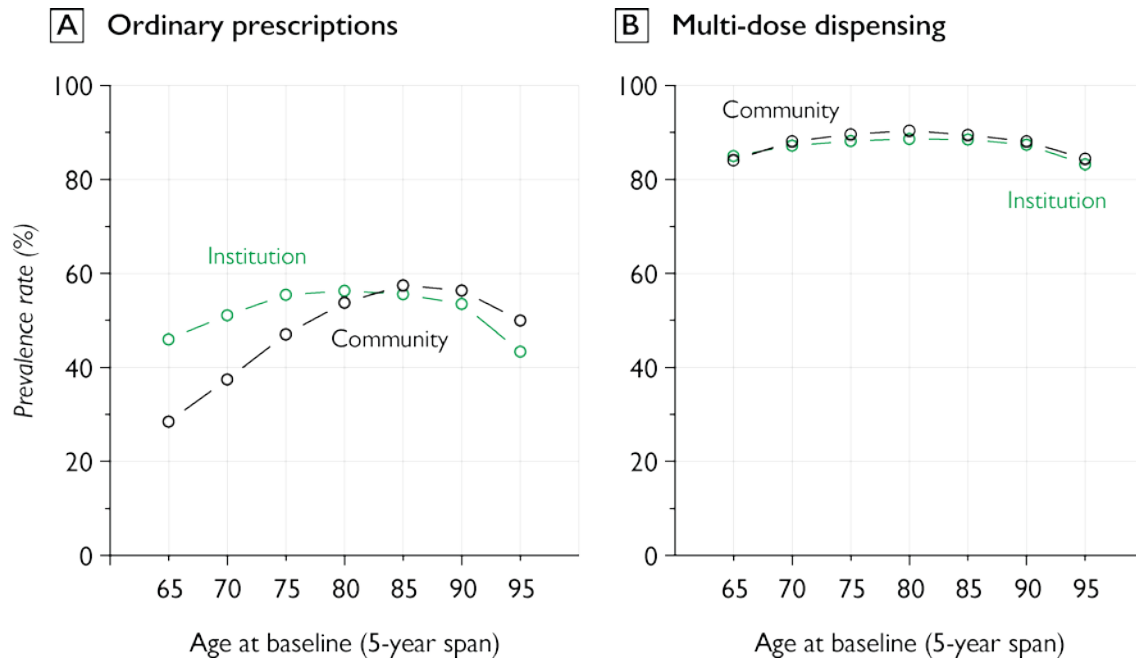

**Figure S4 – Age-specific prevalence of excessive polypharmacy ( $\geq 10$  drugs) at baseline, by living arrangement and drug dispensing**

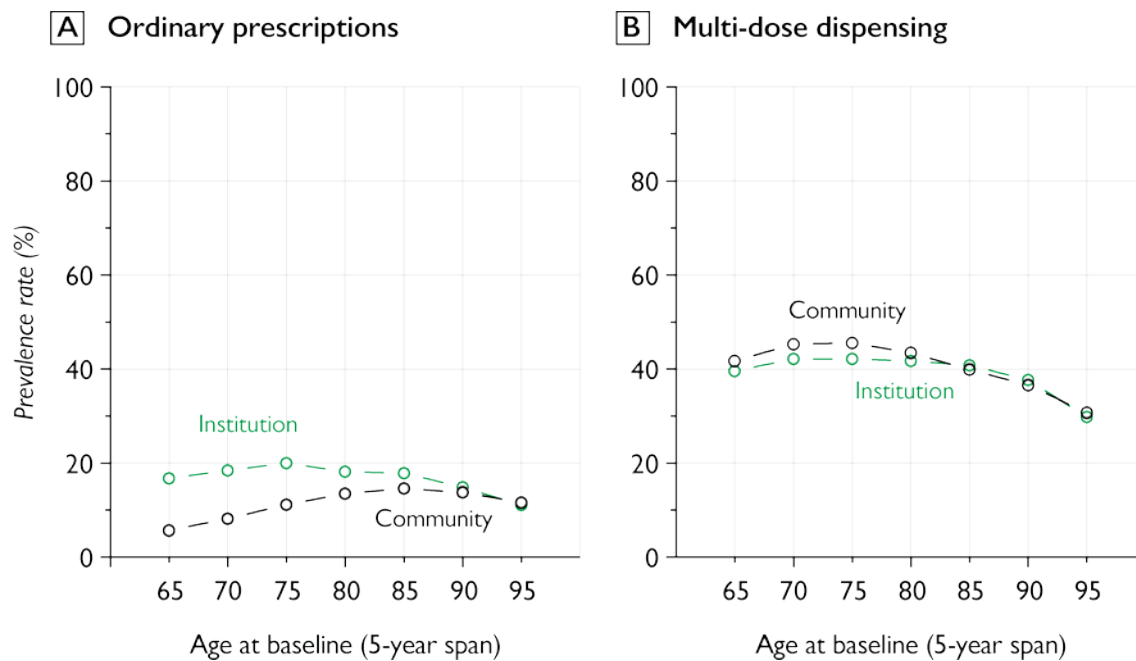



**Table S4 – Sensitivity analysis: prevalence of polypharmacy and excessive polypharmacy after removing antiinfectives (ATC code J)**

|                                   | Mean number of<br>prescription drugs | Prevalence rate (%) |           |
|-----------------------------------|--------------------------------------|---------------------|-----------|
|                                   | Mean (SD)                            | ≥5 drugs            | ≥10 drugs |
| <b>Total cohort</b>               | 4.5 (3.9)                            | 43.4                | 11.2      |
| <b>Sex</b>                        |                                      |                     |           |
| Men                               | 4.1 (3.7)                            | 39.8                | 9.2       |
| Women                             | 4.8 (3.9)                            | 46.3                | 12.8      |
| <b>Age, years</b>                 |                                      |                     |           |
| 65 to 74 years                    | 3.6 (3.6)                            | 32.2                | 6.9       |
| 75 to 84 years                    | 5.3 (3.9)                            | 52.4                | 14.2      |
| 85 to 94 years                    | 6.3 (4.0)                            | 65.0                | 20.4      |
| 95 years and older                | 6.3 (3.8)                            | 66.3                | 19.9      |
| <b>Living arrangement</b>         |                                      |                     |           |
| Community                         | 4.3 (3.8)                            | 41.3                | 9.9       |
| Nursing home                      | 8.1 (4.1)                            | 81.2                | 34.4      |
| <b>Number of chronic diseases</b> |                                      |                     |           |
| 0                                 | 1.6 (2.0)                            | 9.4                 | 0.4       |
| 1                                 | 3.2 (2.6)                            | 27.9                | 2.2       |
| 2                                 | 4.4 (3.0)                            | 44.5                | 6.0       |
| 3                                 | 5.5 (3.2)                            | 59.0                | 11.2      |
| 4                                 | 6.5 (3.4)                            | 70.7                | 17.8      |
| ≥5                                | 8.8 (4.1)                            | 86.7                | 39.8      |
| <b>Drug dispensing scheme</b>     |                                      |                     |           |
| Ordinary prescriptions            | 4.1 (3.6)                            | 39.3                | 8.6       |
| Multi-dose dispensing             | 8.8 (3.9)                            | 87.7                | 39.0      |
| <b>Time to death</b>              |                                      |                     |           |
| >12 months                        | 4.4 (3.8)                            | 41.9                | 10.2      |
| ≤12 months                        | 7.7 (4.5)                            | 74.9                | 32.3      |
| <b>Level of education</b>         |                                      |                     |           |
| Primary education                 | 5.0 (4.0)                            | 49.8                | 13.6      |
| Lower secondary education         | 4.5 (3.9)                            | 42.6                | 11.0      |
| Upper secondary education         | 4.4 (3.8)                            | 41.6                | 10.4      |
| Higher education                  | 3.8 (3.6)                            | 34.9                | 7.8       |

**Figure S5 – Sensitivity analysis: prevalence of polypharmacy according to the number of therapeutic subgroups and to the number of chemical substances**

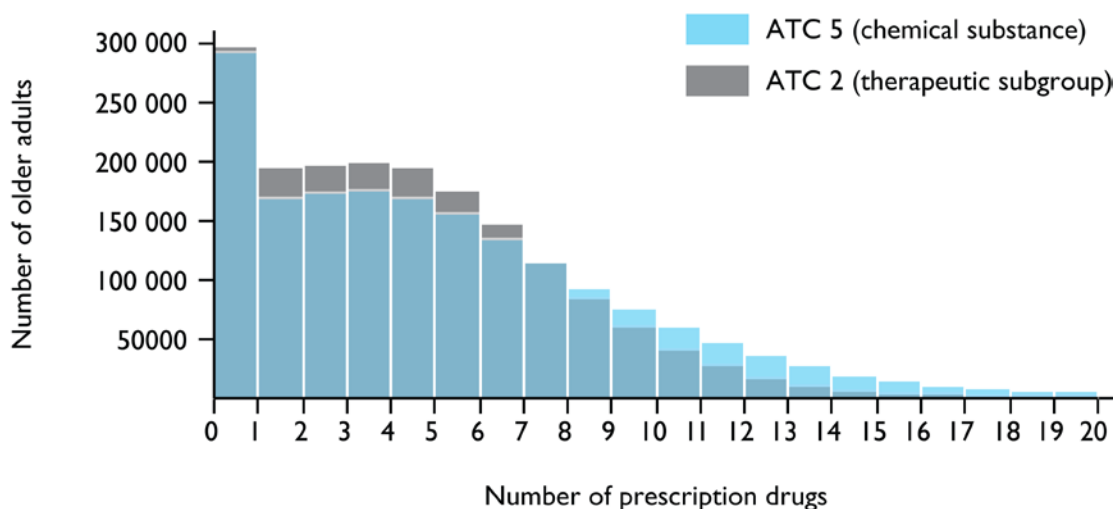

**Figure S6 – Mean number of drugs at from different therapeutic groups baseline, by age**

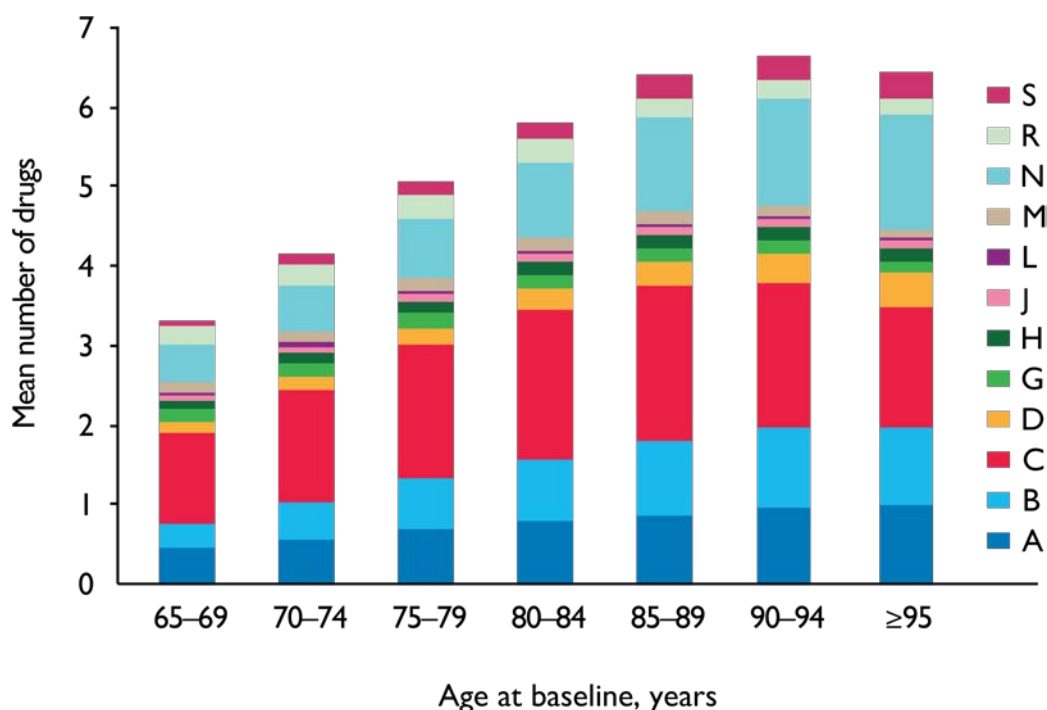

*Note figure S8: Therapeutic groups are presented according to the ATC classification system. Please consult <https://www.whocc.no/> for additional information about ATC.*

**Table S5 – Incidence of excessive polypharmacy ( $\geq 10$  medications) during follow-up**

|                                   | Person-years <sup>a</sup> | Failures <sup>b</sup> | Incidence rate   | Hazard ratio         |                      |
|-----------------------------------|---------------------------|-----------------------|------------------|----------------------|----------------------|
|                                   |                           |                       |                  | Model 1 <sup>c</sup> | Model 2 <sup>d</sup> |
|                                   | No.                       | No.                   | Per 100 p-year   | HR (95% CI)          | HR (95% CI)          |
| <b>Total cohort</b>               | 3 808 624                 | 306 196               | 8.0 (8.0–8.1)    | –                    | –                    |
| <b>Sex</b>                        |                           |                       |                  |                      |                      |
| Men                               | 1 788 817                 | 132 548               | 7.4 (7.4–7.4)    | 1                    | 1                    |
| Women                             | 2 019 807                 | 173 648               | 8.6 (8.6–8.6)    | 1.13 (1.12–1.14)     | 1.13 (1.12 - 1.14)   |
| <b>Age, years</b>                 |                           |                       |                  |                      |                      |
| 65 to 74 years                    | 2 346 735                 | 130 552               | 5.6 (5.5–5.6)    | 1                    | 1                    |
| 75 to 84 years                    | 1 089 584                 | 117 402               | 10.8 (10.7–10.8) | 1.48 (1.47–1.49)     | 1.40 (1.39 - 1.41)   |
| 85 to 94 years                    | 352 221                   | 55 030                | 15.6 (15.5–15.8) | 1.87 (1.85–1.89)     | 1.60 (1.58 - 1.62)   |
| 95 years and older                | 20 085                    | 3212                  | 16.0 (15.4–16.6) | 1.99 (1.92–2.06)     | 1.46 (1.4 - 1.51)    |
| <b>Living arrangement</b>         |                           |                       |                  |                      |                      |
| Community                         | 3 732 275                 | 290 253               | 7.8 (7.7–7.8)    | 1                    | 1                    |
| Nursing home                      | 76 349                    | 15 943                | 20.9 (20.6–21.2) | 1.22 (1.20–1.24)     | 0.86 (0.84 - 0.87)   |
| <b>Number of chronic diseases</b> |                           |                       |                  |                      |                      |
| 0                                 | 1 277 303                 | 29 600                | 2.3 (2.3–2.3)    | 1                    | 1                    |
| 1                                 | 996 253                   | 55 967                | 5.6 (5.6–5.7)    | 2.28 (2.25–2.31)     | 2.28 (2.24 - 2.31)   |
| 2                                 | 657 241                   | 60 913                | 9.3 (9.2–9.3)    | 3.6 (3.55–3.65)      | 3.59 (3.54 - 3.64)   |
| 3                                 | 400 398                   | 53 204                | 13.3 (13.2–13.4) | 5.02 (4.94–5.09)     | 4.97 (4.9 - 5.04)    |
| 4                                 | 231 880                   | 40 816                | 17.6 (17.4–17.8) | 6.45 (6.36–6.55)     | 6.34 (6.24 - 6.44)   |
| $\geq 5$                          | 245 550                   | 65 696                | 26.8 (26.6–27)   | 9.41 (9.28–9.54)     | 9.05 (8.92 - 9.18)   |
| <b>Drug dispensing scheme</b>     |                           |                       |                  |                      |                      |
| Ordinary prescriptions            | 3 689 811                 | 276 592               | 7.5 (7.5–7.5)    |                      | 1                    |
| Multi-dose dispensing             | 118 814                   | 29 604                | 24.9 (24.6–25.2) |                      | 1.58 (1.56 - 1.61)   |
| <b>Time to death</b>              |                           |                       |                  |                      |                      |
| >12 months                        | 3 789 561                 | 296 196               | 7.8 (7.8–7.8)    |                      | 1                    |
| $\leq 12$ months                  | 19 063                    | 10 000                | 52.5 (51.4–53.5) |                      | 2.94 (2.88 - 3.01)   |
| <b>Level of education</b>         |                           |                       |                  |                      |                      |
| Primary education                 | 1 294 958                 | 124 953               | 9.6 (9.6–9.7)    |                      | 1                    |
| Lower secondary education         | 259 263                   | 20 292                | 7.8 (7.7–7.9)    |                      | 0.94 (0.92 - 0.95)   |
| Upper secondary education         | 1 387 419                 | 105 704               | 7.6 (7.6–7.7)    |                      | 0.93 (0.92 - 0.93)   |
| Higher education                  | 788 771                   | 48 918                | 6.2 (6.1–6.3)    |                      | 0.81 (0.80 - 0.82)   |

<sup>a</sup> Contributing time (in years) of older adults free of excessive polypharmacy at baseline (n=1 438 437)

<sup>b</sup> First period of exposure to polypharmacy ('single-failure' incident cases)

<sup>c</sup> Cox proportional hazard regression model including sex, age and number of chronic diseases as independent variables.

<sup>d</sup> Cox proportional hazard regression model including all covariates presented in the table. Because of missing values for the level of education (n=30 772; 2.1%), results from Model 2 are based on a subset of 1 407 665 (97.9%) individuals.

**Figure S7 – Cumulative incidence of excessive polypharmacy ( $\geq 10$  drugs) during follow-up**

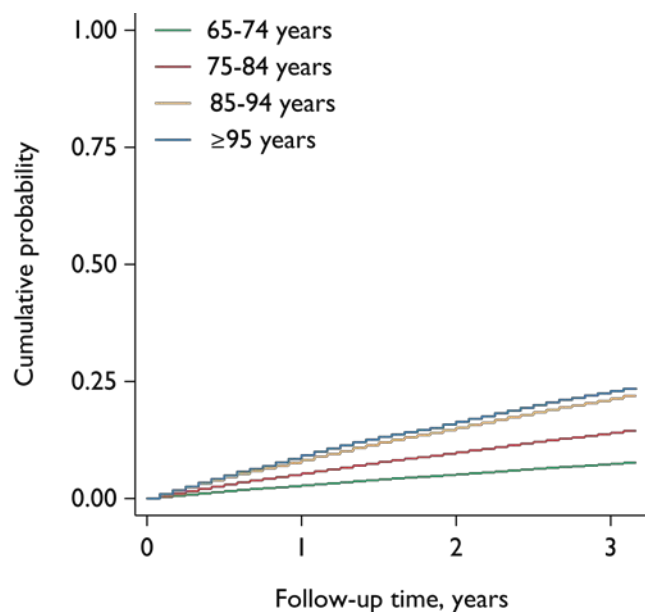

\*Kaplan-Meier failure function adjusted for sex, living arrangement, number of chronic diseases at baseline, drug dispensing scheme, level of education and time to death ( $n=1\ 407\ 665$ )

**Table S6 – Incidence rate of polypharmacy ( $\geq 5$  drugs) according to the number of prescription drugs at baseline**

| Number of drugs at baseline | Person-years | Failures | Incidence rate <sup>a</sup> |
|-----------------------------|--------------|----------|-----------------------------|
|                             | No.          | No.      | Per 100 person-year         |
| 0 drug                      | 776415       | 57830    | 7.4 (7.3–7.5)               |
| 1 drug                      | 401874       | 58741    | 14.6 (14.5–14.7)            |
| 2 drugs                     | 333155       | 83234    | 25.0 (24.8–25.2)            |
| 3 drugs                     | 220498       | 93869    | 42.6 (42.3–42.8)            |
| 4 drugs                     | 91619        | 70030    | 76.4 (75.9–77.0)            |

<sup>a</sup> Adjusted for age, sex, living arrangement, number of chronic diseases at baseline, drug dispensing scheme, level of education and time to death.

**Table S7 – Incidence rate of polypharmacy ( $\geq 5$  drugs) according to the duration of the first polypharmacy episode**

| Duration of polypharmacy | Person-years <sup>a</sup> | Failures <sup>b</sup> | Incidence rate      |
|--------------------------|---------------------------|-----------------------|---------------------|
|                          | No.                       | No.                   | Per 100 person-year |
| $\geq 1$ month           | 1 823 560                 | 363 704               | 19.9 (19.8–20.0)    |
| $\geq 2$ months          | 1 947 738                 | 302 959               | 15.6 (15.5–15.7)    |
| $\geq 3$ months          | 2 071 804                 | 237 707               | 11.5 (11.4–11.6)    |
| $\geq 4$ months          | 2 143 822                 | 195 892               | 9.1 (9.0–9.2)       |
| $\geq 5$ months          | 2 205 124                 | 159 972               | 7.3 (7.2–7.4)       |
| $\geq 6$ months          | 2 240 148                 | 138 243               | 6.2 (6.1–6.3)       |

**Figure S8 – Incidence rate of polypharmacy ( $\geq 5$  drugs) according to the duration of the first polypharmacy episode**

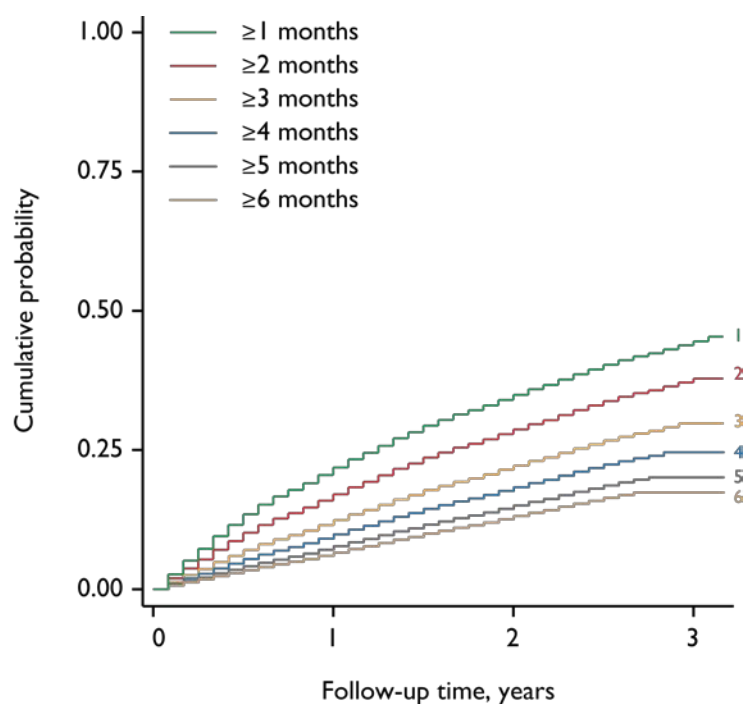

\* Curves represent the unadjusted Kaplan-Meier failure functions

**Figure S9 – Variation in the number of prescribed drugs during the 6 months before and 6 months after baseline**

**A** Mean number of prescribed drugs

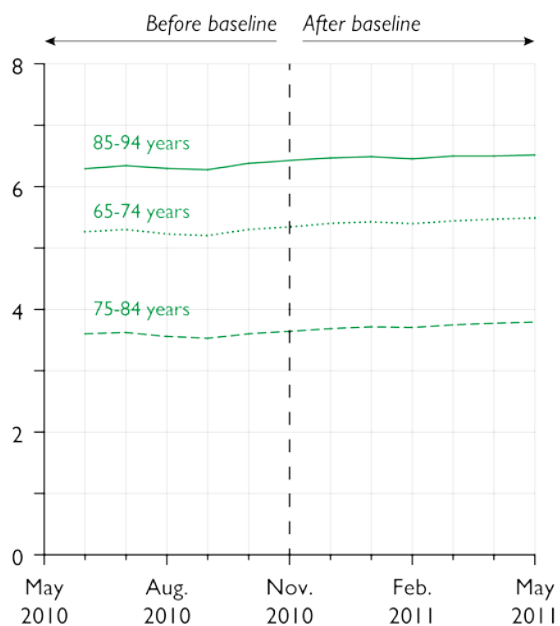

**B** Prevalence rate of polypharmacy ( $\geq 5$  drugs)

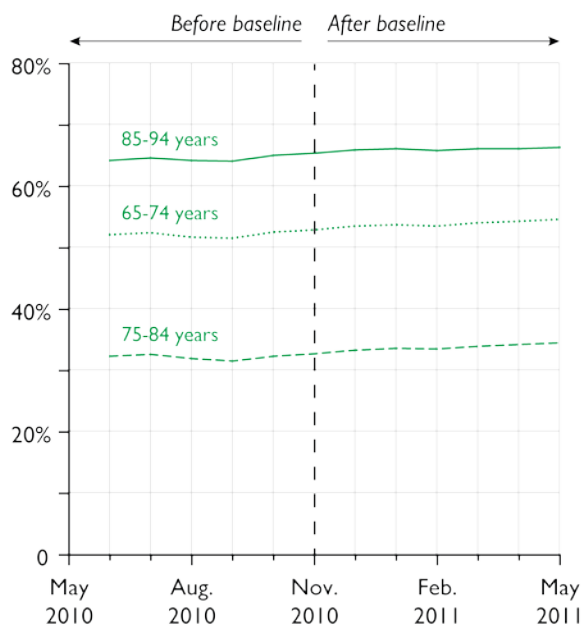

Supplement: Supplementary file 1 [file get_supplementary_file.php%3Ff%3D153458.pdf]
